# Supplementary material for: Characteristics, Natural Course and Treatment of Intramuscular Capillary-type Haemangioma: A Systematic Literature Review
Source: PubMed Central journal article supplement — Acta Derm Venereol. 2023 Mar 20;103:4432. doi: 10.2340/actadv.v103.4432 (PMC10041649; doi:10.2340/actadv.v103.4432), 2023-03-20
Supplement: ActaDV-103-4432-s1.pdf [file ActaDV-103-4432-s1.pdf]

Supplementary material has been published as submitted. It has not been copyedited, typeset or checked for scientific content by Acta Dermato-Venereologica

## Appendix S1

### Search equations for the systematic review

(Total: 1143 results)

#### ○ MEDLINE (PubMed)

(intramuscular AND hemangioma) OR (intramuscular AND arteriovenous) OR (intramuscular AND high flow vascular) OR (intramuscular AND fast flow vascular) OR (skeletal muscle AND angioliopoma) OR (intramuscular AND angioliopoma)

Filters: [1972-28/03/21](#); Humans

→ 429 results

#### ○ EMBASE

(intramuscular AND hemangioma OR (intramuscular AND arteriovenous) OR (intramuscular AND high AND flow AND vascular) OR (intramuscular AND fast AND flow AND vascular) OR (skeletal AND muscle AND angioliopoma) OR (intramuscular AND angioliopoma)) AND [humans]/lim AND [embase]/lim AND [1972-2021]/py

→ 693 results

#### ○ CENTRAL

In Title Abstract Keyword: (intramuscular AND hemangioma) OR (intramuscular AND arteriovenous) OR (intramuscular AND high flow vascular) OR (intramuscular AND fast flow vascular) OR (skeletal muscle AND angioliopoma) OR (intramuscular AND angioliopoma)

1972-2021

→ 21 results

## Appendix S2

### Comparisons among subgroups of patients with ICTH

**Table S1. Comparisons according to the trunk/head and neck topography**

| Variables                           | Trunk            | Head and neck    | P     | Missing data |
|-------------------------------------|------------------|------------------|-------|--------------|
| Number of patients                  | N=15             | N=33             |       |              |
| Age at first signs (years)          | 19.7 [8.8–25.0]  | 31.0 [20.1–46.5] | 0.029 | 36           |
| Age at diagnostic (years)           | 11.0 [4.8–25.0]  | 31.0 [20.0–42.0] | 0.002 | 0            |
| Size in diameter (cm <sup>2</sup> ) | 36.0 [22.4–69.5] | 13.0 [7.5–19.3]  | 0.014 | 21           |
| Pain, n (%)                         |                  |                  | 1.000 | 29           |
| Yes                                 | 2 (20.0)         | 5 (17.2)         |       |              |
| No                                  | 8 (80.0)         | 24 (82.8)        |       |              |
| Post-treatment follow-up (months)   | 24.0 [24.0–24.0] | 14.0 [6.0–21.0]  | 0.258 | 45           |

**Table S2. Comparisons according to the limb topography**

| Variables                           | Lower limb       | Upper limb       | P     | Missing data |
|-------------------------------------|------------------|------------------|-------|--------------|
| Number of patients                  | N=15             | N=12             |       |              |
| Age at first signs (years)          | 9.0 [8.0–15.0]   | 16.0 [9.0–23.0]  | 0.699 | 28           |
| Age at diagnostic (years)           | 9.0 [5.3–14.0]   | 15.2 [7.9–22.6]  | 0.643 | 36           |
| Size in diameter (cm <sup>2</sup> ) | 51.8 [34.4–81.1] | 18.4 [14.2–22.3] | 0.037 | 21           |
| Pain, n (%)                         |                  |                  | 1.000 | 29           |
| Yes                                 | 4 (80.0)         | 1 (50.0)         |       |              |
| No                                  | 1 (20.0)         | 1 (50.0)         |       |              |
| Post-treatment follow-up (months)   | 3.0 [2.0–13.5]   | 9.0 [7.5–10.5]   | 0.564 | 45           |

**Table S3. Comparisons according to the age of patients**

| <b>Variables</b>                    | <b>≤ 16 years</b> | <b>&gt; 16 years</b> | <b>P</b> | <b>Missing data</b> |
|-------------------------------------|-------------------|----------------------|----------|---------------------|
| Number of patients                  | N=33              | N=42                 |          |                     |
| Age at first signs (years)          | 2.8 [0.9–5.9]     | 30.0 [20.2–41.8]     | <0.001   | 36                  |
| Age at diagnostic (years)           | 7.0 [4.0–11.0]    | 29.5 [21.0–39.8]     | <0.001   | 0                   |
| Size in diameter (cm <sup>2</sup> ) | 19.8 [8.5–55.2]   | 18.6 [12.0–46.5]     | 0.726    | 21                  |
| Pain, n (%)                         |                   |                      | 0.329    | 29                  |
| Yes                                 | 4 (44.4)          | 8 (21.6)             |          |                     |
| No                                  | 5 (55.6)          | 29 (78.4)            |          |                     |
| Location, n (%)                     |                   |                      | 0.048    | 27                  |
| Trunk                               | 7 (58.3)          | 8 (22.2)             |          |                     |
| Head & neck                         | 5 (41.7)          | 28 (77.8)            |          |                     |
| Post-treatment follow-up (months)   | 17.0 [13.0–22.5]  | 12.0 [6.0–24.0]      | 0.714    | 45                  |
